# Supplementary material for: Application of Dialectical Behaviour Therapy in treating common psychiatric disorders: study protocol for a scoping review
Source: HighWire-hosted journal article supplement (doi:10.1136/bmjopen-2021-058565), 2022-09-01
Supplement: bmjopen-2021-058565supp003_data_supplement.pdf [file bmjopen-2021-058565supp003_data_supplement.pdf]

### Supplementary File 3

#### Abstract Screening Tool

- To screen in (INCLUDE in scoping review), you should say “yes” or “unsure” to each question.
  - To screen out (EXCLUDE from scoping review), you should clearly say “no” to any of the questions.
1. **Language:** Are the title and abstract both written in English?
  2. **Empirical:** Is this an empirical article? (if it is a qualitative study, or a single-sample case study/ report, review or commentary, then screen out)
  3. **Population:** Are participants presenting with clinical or subclinical symptoms of any psychiatric disorder, or at least reporting clinically significant distress? Note that there are no age or gender restrictions. (If the study involves non-clinical participants, then screen out)
  4. **Setting:** Is the study based in a clinical setting – including but not limited to health, psychiatric, community health and forensic mental health settings? (if setting is non-clinical, such as classroom-based or correctional [e.g., targeted at offending behaviors only], then screen out)
  5. **Intervention:** Is DBT the primary intervention, or a comparison/control condition in the study? Does the intervention deliver at least 1 of the four treatment modes of Dialectical Behavior Therapy? Note that this constitutes individual DBT, DBT skills training, telephone consultation and the therapist consultation team, and includes any modifications made to standard DBT e.g., DBT skills training conducted on an individual basis, self-guided skills training, etc. (if the therapy studied is integrative, or a different treatment that merely incorporates elements of DBT, then screen out)
  6. **Outcome:** Is symptom severity for any psychiatric condition being evaluated i.e., using psychometric measures?
  7. **Methodology:** Are there at least 2 assessment time points i.e., pre- and post-treatment measures administered? (if only one assessment time point, then screen out)

#### Brief Guide on Screening Terms in Articles:

| Likely to be Relevant                                                                                                                                                                                                                                                                                                                                                                                                                                                                                                                                | Unlikely to be Relevant                                                                                                                                                                                                                                                                                                                                                                                                     |
|------------------------------------------------------------------------------------------------------------------------------------------------------------------------------------------------------------------------------------------------------------------------------------------------------------------------------------------------------------------------------------------------------------------------------------------------------------------------------------------------------------------------------------------------------|-----------------------------------------------------------------------------------------------------------------------------------------------------------------------------------------------------------------------------------------------------------------------------------------------------------------------------------------------------------------------------------------------------------------------------|
| <ul style="list-style-type: none"> <li>- Dialectical Behavior Therapy (DBT)</li> <li>- Radically Open DBT (RO DBT)</li> <li>- Psychotherapy</li> <li>- DBT skills program</li> <li>- DBT skills training</li> <li>- Mindfulness</li> <li>- Distress Tolerance</li> <li>- Emotion regulation</li> <li>- Emotion dysregulation</li> <li>- Borderline Personality Disorder (BPD)</li> <li>- Self-Harm</li> <li>- Suicidal Ideation</li> <li>- Eating disorders</li> <li>- Depression</li> <li>- Anxiety</li> <li>- Addiction</li> <li>- ADHD</li> </ul> | <ul style="list-style-type: none"> <li>- Digital breast tomosynthesis (DBT)</li> <li>- Digital mammography</li> <li>- Breast images</li> <li>- X-ray</li> <li>- 3D, 2D</li> <li>- Dibenzothiophene (DBT)</li> <li>- Dibutyltin (DBT)</li> <li>- Plasma</li> <li>- Cell</li> <li>- Genes</li> <li>- Urine and/or urine disease</li> <li>- Desulfurization/ biodesulfurization</li> <li>- Danggui Buxue Tang (DBT)</li> </ul> |
